# Supplementary material for: Revealing the structure deformation in multi-component lipids by dynamic speckle pattern analysis
Source: Research Square preprint supplement (doi:10.21203/rs.3.rs-396278/v1), 2021-04-09
Supplement: Supplementary file 1 [file 38ec01f4bca9794cee2e710b.pdf]

## Supplementary Material

### **Revealing the structure deformation in multi-component lipids by dynamic speckle pattern analysis**

Majid Panahi<sup>1,2</sup>, Vahideh Farzam Rad<sup>2</sup>, Shiva Sasan<sup>1</sup>, Ramin Jamali<sup>2</sup>,  
Ali-Reza Moradi<sup>2,3</sup>, Ahmad Darudi<sup>1,\*</sup>

<sup>1</sup> Department of Physics, Faculty of Science, University of Zanjan, 45371-38791, Zanjan

<sup>2</sup> Department of Physics, Institute for Advanced Studies in Basic Sciences (IASBS),  
Zanjan 45137-66731, Iran

<sup>3</sup> School of Nano Science, Institute for Research in Fundamental Sciences (IPM), Tehran  
19395-5531, Iran

\*Corresponding author: *darudi@znu.ac.ir*

#### **Contents:**

##### **Supplementary Figure S1**

Time history speckle pattern (THSP), 3D plot, and 2D map matrix associated with the THSPs of the sample in controlling experiment.

##### **Supplementary Figure S2**

Motion history image (MHI), temporal speckle kurtosis, and skewness matrices of the sample in controlling experiment.

##### **Supplementary Figure S3**

Relative inertia moment, relative kurtosis, and relative skewness parameters associated with the sample in controlling experiment.

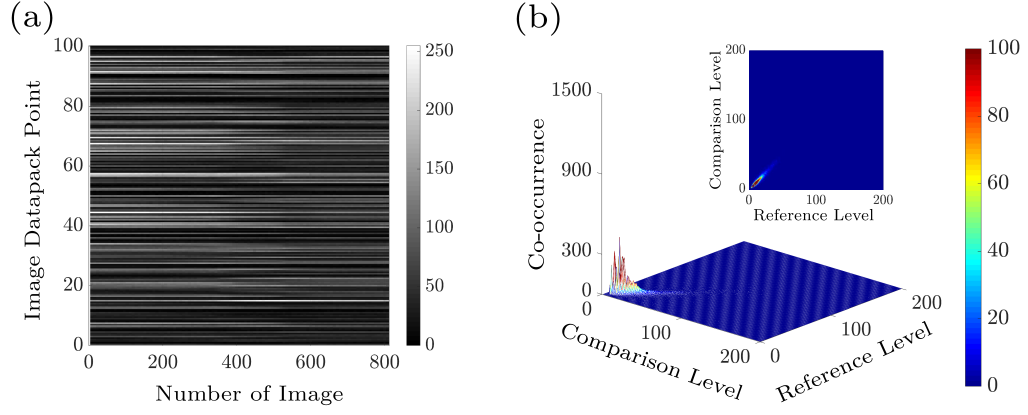

Supplementary Figure S1: (a) Time history speckle pattern (THSP) of the sample in controlling experiment. THSP formed by tracking 100 random points throughout a collection of 800 speckle patterns of lipid (image datapack points). (b) 3D plot and 2D map of Co-occurrence matrix (COM) of the associated THSPs in Fig. S1 (a).

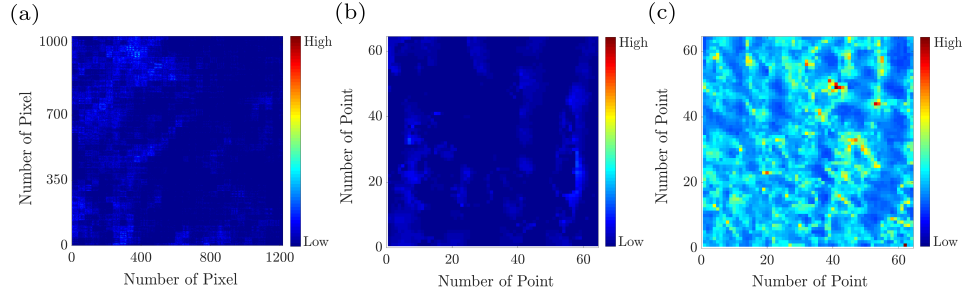

Supplementary Figure S2: (a) Motion history image (MHI), (b) temporal speckle kurtosis, and (c) skewness maps of a lipid 20% Chol in controlling experiment.

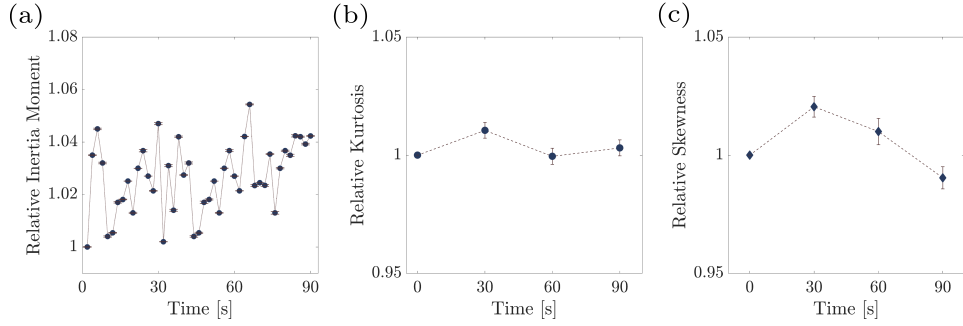

Supplementary Figure S3: (a) Relative inertia moment, (b) relative kurtosis, and (c) relative skewness parameters associated of a lipid 20% Chol in controlling experiment.
